# Supplementary material for: AtSEC22 Regulates Cell Morphogenesis via Affecting Cytoskeleton Organization and Stabilities
Source: Front Plant Sci. 2021 Jun 4;12:635732. doi: 10.3389/fpls.2021.635732 (PMC8211912; doi:10.3389/fpls.2021.635732)
Supplement: Supplementary Table 2 — Original data of LC-MS/MS. [file Table_2.XLSX]

## Sheet: Sheet1
Gene	Description	peptide_hit_number-1	prot_matches-1 (myc-AtSEC22/WT)	peptide score-1	peptide_hit_number-2	prot_matches-2 (myc-AtSEC22/WT)	peptide score-1	prot_score	prot_mass	prot_matches_sig	prot_sequences	prot_sequences_sig	pep_query	prot_desc	pep_rank	pep_isbold	pep_isunique	pep_exp_mz	pep_exp_mr	pep_exp_z	pep_calc_mr	pep_delta	pep_miss	pep_expect	pep_res_before	pep_seq	prot_family_member	pep_res_after	pep_var_mod	pep_var_mod_pos	pep_summed_mod_pos	pep_local_mod_pos	pep_scan_title
AT1G11890	AtSEC22, R-SNARE	76	5/0	26.44	15	1/0	17.27	77	25430	4	5	4	551	| Symbols: SEC22, ATSEC22 | Synaptobrevin family protein | chr1:4011509-4012835 FORWARD LENGTH=218	1	1	1	352.709	703.403	2	703.405	-0.0019	0	0.022	K	MTLIAR	1	V					File10433 Spectrum14400 scans: 21114
AT3G24350	AtSYP32, Qa-SNARE	1	158/0	30.99	9	28/0	34.34	1929	53435	140	27	27	13995	| Symbols: SYP32, ATSYP32 | syntaxin of plants 32 | chr3:8837733-8839402 FORWARD LENGTH=347	1	1	1	558.795	1115.58	2	1115.58	0.0001	0	0.0012	R	VALEACVQAR	1	N					File11133 Spectrum61677 scans: 69919
AT5G55230	AtMAP65-1, MT-associated	11	39/0	23.97	26	1/0	22.5	360	48086	27	14	14	4493	| Symbols: ATMAP65-1, MAP65-1 | microtubule-associated proteins 65-1 | chr5:22402716-22405182 FORWARD LENGTH=587	2	0	0	417.727	833.439	2	833.439	-0.0007	0	0.12	K	VAINGFGR	3	I	Deamidated (NQ)	0.00010000.0			File11133 Spectrum37066 scans: 42636
AT2G38720	AtMAP65-5, MT-associated	6	1/0	26.02	2	1/0	19.64	57	20558	50	6	6	7024	| Symbols: ATMAP65-5, MAP65-5 | microtubule-associated proteins 65-5 | chr2:16188047-16192102 FORWARD LENGTH=475	1	0	0	468.251	934.487	2	934.487	-0.0005	0	0.0022	R	IIGFDNTR		Q					File11133 Spectrum43692 scans: 50036
AT2G20190	AtCLASP, MT-associated	12	7/0	65.46	3	2/0	19.26	226	43165	7	4	4	23865	| Symbols: ATCLASP, CLASP | CLIP-associated protein | chr2:8711862-8718813 REVERSE LENGTH=1439	1	0	0	666.854	1331.69	2	1331.69	0.0001	0	1.2e-06	K	GILAADESTGTIGK		R					File11133 Spectrum33391 scans: 38501
AT4G29350	PRF2, AF organization	7	10/0	30.79	93	3/0	23.58	176	49607	8	8	7	6759	| Symbols: PFN2, PRO2, PRF2 | profilin 2 | chr4:14450135-14451119 FORWARD LENGTH=131	1	0	1	464.261	926.507	2	926.507	-0.0002	0	0.0047	K	VELPENVK	2	M					File11133 Spectrum25818 scans: 29848
AT4G30160	AtVLN4,AF bundling	9	43/0	45.49	447	3/1	24.92	555	71712	36	25	22	22002	| Symbols: VLN4, ATVLN4 | villin 4 | chr4:14754528-14759511 FORWARD LENGTH=974	1	1	0	647.814	1293.61	2	1293.62	-0.0044	0	0.00081	R	MVNHFVQEFK	1	R	Oxidation (M)	0.2000000000.0			File11133 Spectrum30293 scans: 34970
AT1G01750	ADF11, actin depolymerizing	689	1/0	28.52	38	1/0	23.67	29	16502	1	1	1	1945	| Symbols: ADF11 | actin depolymerizing factor 11 | chr1:275528-276126 FORWARD LENGTH=140	1	0	1	400.205	798.395	2	798.394	0.0003	0	0.0059	K	MLYASSK		D					File: ~Z:\orbitrap fusion\qgc\20171125_QGC_LLX_22N_02.raw~; SpectrumID: ~7741~; scans: ~10222~

## Sheet: Sheet2
Gene	Description
At5G55230	AtMAP65-1, microtubule-associated protein 65-1
At2G38720	AtMAP65-5, microtubule-associated protein 65-5
At2G20190	AtCLASP, a microtubule-associated protein
At4G30160	AtVLN4, a major actin filament bundling protein
At4G29350	AtPRF2, actin monomer-binding protein that regulates the organization of AFs.
At1G01750	ADF11, actin depolymerizing factor 11

## Sheet: Sheet3
Gene	Description	hit_1	matches-1 (SEC22-OE/Col-0)	score-1	hit_2	matches-2 (SEC22-OE/Col-0)	score-2	prot_score	prot_mass	prot_matches_sig	prot_sequences	prot_sequences_sig	pep_query	prot_desc	pep_rank	pep_isbold	pep_isunique	pep_exp_mz	pep_exp_mr	pep_exp_z	pep_calc_mr	pep_delta	pep_miss	pep_expect	pep_res_before	pep_seq	prot_family_member	pep_res_after	pep_var_mod	pep_var_mod_pos	pep_summed_mod_pos	pep_local_mod_pos	pep_scan_title
AT1G11890	AtSEC22, R-SNARE	76	5/0	26.44		1/0	17.27	77	25430	4	5	4	551	| Symbols: SEC22, ATSEC22 | Synaptobrevin family protein | chr1:4011509-4012835 FORWARD LENGTH=218	1	1	1	352.709	703.403	2	703.405	-0.0019	0	0.022	K	MTLIAR	1	V					File10433 Spectrum14400 scans: 21114
AT3G24350	AtSYP32, Qa-SNARE	1	158/0	30.99		28/0	34.34	1929	53435	140	27	27	13995	| Symbols: SYP32, ATSYP32 | syntaxin of plants 32 | chr3:8837733-8839402 FORWARD LENGTH=347	1	1	1	558.795	1115.58	2	1115.58	0.0001	0	0.0012	R	VALEACVQAR	1	N					File11133 Spectrum61677 scans: 69919
AT5G55230	AtMAP65-1, MT-associated	11	39/0	23.97		1/0	22.5	360	48086	27	14	14	4493	| Symbols: ATMAP65-1, MAP65-1 | microtubule-associated proteins 65-1 | chr5:22402716-22405182 FORWARD LENGTH=587	2	0	0	417.727	833.439	2	833.439	-0.0007	0	0.12	K	VAINGFGR	3	I	Deamidated (NQ)	0.00010000.0			File11133 Spectrum37066 scans: 42636
AT2G38720	AtMAP65-5, MT-associated	6	1/0	26.02		1/0	19.64	57	20558	50	6	6	7024	| Symbols: ATMAP65-5, MAP65-5 | microtubule-associated proteins 65-5 | chr2:16188047-16192102 FORWARD LENGTH=475	1	0	0	468.251	934.487	2	934.487	-0.0005	0	0.0022	R	IIGFDNTR		Q					File11133 Spectrum43692 scans: 50036
AT4G29350	PRF2, AF organization	7	10/0	30.79		3/0	23.58	176	49607	8	8	7	6759	| Symbols: PFN2, PRO2, PRF2 | profilin 2 | chr4:14450135-14451119 FORWARD LENGTH=131	1	0	1	464.261	926.507	2	926.507	-0.0002	0	0.0047	K	VELPENVK	2	M					File11133 Spectrum25818 scans: 29848
AT4G30160	AtVLN4,AF bundling	9	43/0	45.49		3/1	24.92	555	71712	36	25	22	22002	| Symbols: VLN4, ATVLN4 | villin 4 | chr4:14754528-14759511 FORWARD LENGTH=974	1	1	0	647.814	1293.61	2	1293.62	-0.0044	0	0.00081	R	MVNHFVQEFK	1	R	Oxidation (M)	0.2000000000.0			File11133 Spectrum30293 scans: 34970
AT2G20190	AtCLASP, MT-associated	12	7/0	65.46		2/0	19.26	226	43165	7	4	4	23865	| Symbols: ATCLASP, CLASP | CLIP-associated protein | chr2:8711862-8718813 REVERSE LENGTH=1439	1	0	0	666.854	1331.69	2	1331.69	0.0001	0	1.2e-06	K	GILAADESTGTIGK		R					File11133 Spectrum33391 scans: 38501
AT1G01750	ADF11, actin depolymerizing	689	1/0	28.52		1/0	23.67	29	16502	1	1	1	1945	| Symbols: ADF11 | actin depolymerizing factor 11 | chr1:275528-276126 FORWARD LENGTH=140	1	0	1	400.205	798.395	2	798.394	0.0003	0	0.0059	K	MLYASSK		D					File: ~Z:\orbitrap fusion\qgc\20171125_QGC_LLX_22N_02.raw~; SpectrumID: ~7741~; scans: ~10222~
		hit_1	prot_matches-1(AtSEC22-OE/Col-0)	peptide score-1	hit_num_2	prot_matches-2(AtSEC22-OE/Col-0)	peptide score-2
